# Supplementary material
Source: publisher site journal article supplement (https://www.dovepress.com/article/581526)
Supplement: Supplementary file 1 [file 581526_Supplementary%20Materials%201.docx]

**Supplementary Materials 1** Types of Contraception

| **Combined pill**  (Hormonal)  Contains hormones progestogen and oestrogen | [**Progestogen-only pill**](https://www.nhs.uk/contraception/methods-of-contraception/progestogen-only-pill/)  (Hormonal)  Also called the mini pill, contains the hormone progestogen | [**IUD (intrauterine device, or copper coil)**](https://www.nhs.uk/contraception/methods-of-contraception/iud-coil/)  (Non-hormonal)  Inserted into the womb (uterus), does not contain hormones, and can be used as emergency contraception |
| --- | --- | --- |
| [**IUS (intrauterine system or hormonal coil)**](https://www.nhs.uk/contraception/methods-of-contraception/ius-hormonal-coil/)  (Hormonal)  Inserted into the womb (uterus), and releases the hormone progestogen | [**Contraceptive implant**](https://www.nhs.uk/contraception/methods-of-contraception/contraceptive-implant/)  (Hormonal)  Inserted under the skin of your arm, and releases the hormone progestogen | [**Contraceptive injection**](https://www.nhs.uk/contraception/methods-of-contraception/contraceptive-injection/)  (Hormonal)  An injection that contains the hormone progestogen |
| [**Contraceptive patch**](https://www.nhs.uk/contraception/methods-of-contraception/contraceptive-patch/)  (Hormonal)  A sticky patch is worn on the skin and releases the hormones progestogen and oestrogen | [**Vaginal ring**](https://www.nhs.uk/contraception/methods-of-contraception/vaginal-ring/)  (Hormonal)  A soft, flexible ring put in the vagina, releasing the hormones progestogen and oestrogen | [**Condoms**](https://www.nhs.uk/contraception/methods-of-contraception/condoms/)  (Non-hormonal)  Worn on the penis to help prevent pregnancy and sexually transmitted infections (STIs) |
| [**Internal (female) condoms**](https://www.nhs.uk/contraception/methods-of-contraception/internal-condoms/)  (Non-hormonal)  Put in the vagina before sex to help prevent pregnancy and sexually transmitted infections (STIs) | [**Female sterilisation**](https://www.nhs.uk/contraception/methods-of-contraception/female-sterilisation/)  (Non-hormonal, intended to be permanent)  A procedure that permanently stops eggs meeting sperm | [**Vasectomy (male sterilisation)**](https://www.nhs.uk/contraception/methods-of-contraception/vasectomy-male-sterilisation/)  (Non-hormonal, may be permanent)  A procedure that permanently stops sperm being ejaculated during sex |
| [**Diaphragm or cap**](https://www.nhs.uk/contraception/methods-of-contraception/contraceptive-diaphragm-or-cap/)  (Non-hormonal)  Put inside the vagina before sex to stop sperm getting into the womb | [**Natural family planning**](https://www.nhs.uk/contraception/methods-of-contraception/natural-family-planning/)  (Non-hormonal)  Includes tracking your menstrual cycle to avoid sex when you're most fertile | [**Emergency pill (morning after pill)**](https://www.nhs.uk/contraception/methods-of-contraception/emergency-contraceptive-pill-morning-after-pill/)  (Hormonal)  This is taken within 3 or 5 days after sex, depending on the type of pill |

Adapted from https://www.nhs.uk/contraception/methods-of-contraception/20
